# Supplementary material for: Systems analysis of plasma IgG intact N-glycopeptides from patients with chronic kidney diseases via EThcD-sceHCD-MS/MS
Source: Royal Society of Chemistry journal article supplement (doi:10.1039/d1an01657a), 2021-01-01

**Supporting information for**  
**Systems analysis of plasma IgG intact N-glycopeptides from patients with**  
**chronic kidney diseases via EThcD-sceHCD-MS/MS**

Yong Zhang<sup>1,2\*</sup>, Shanshan Zheng<sup>1</sup>, Yonghong Mao<sup>3</sup>, Wei Cao<sup>1</sup>, Lijun Zhao<sup>4</sup>, Changwei Wu<sup>5</sup>, Jingqiu  
Cheng<sup>1</sup>, Fang Liu<sup>4,\*</sup>, Guisen Li<sup>5,\*</sup>, Hao Yang<sup>1,2\*</sup>

<sup>1</sup>NHC Key Laboratory of Transplant Engineering and Immunology, Institutes for Systems Genetics; National Clinical Research Center for Geriatrics, West China Hospital, Sichuan University, Chengdu 610041, China.

<sup>2</sup>Sichuan Provincial Engineering Laboratory of Pathology in Clinical Application, West China Hospital, Sichuan University, Chengdu 610041, China.

<sup>3</sup>Institute of Thoracic Oncology, West China Hospital, Sichuan University, Chengdu 610041, China.

<sup>4</sup>Division of Nephrology, West China Hospital, Sichuan University, Chengdu, 610041, China.

<sup>5</sup>Renal Department and Institute of Nephrology, Sichuan Provincial People's Hospital, University of Electronic Science and Technology of China, Sichuan Clinical Research Center for Kidney Diseases, Chengdu 611731, China.

\*Corresponding authors.

E-mail address: [nankai1989@foxmail.com](mailto:nankai1989@foxmail.com) (Y. Zhang), [liufangfh@163.com](mailto:liufangfh@163.com) (F. Liu),  
[guisenli@163.com](mailto:guisenli@163.com) (GS. Li), [yanghao@scu.edu.cn](mailto:yanghao@scu.edu.cn) (H. Yang)

### **Supplementary Figures:**

**Figure S1.** The relative abundance of IgG subclasses (A) and the number of unique intact N-glycopeptides and N-glycans (B) of quality control (QC) samples;

**Figure S2.** Correlation analysis of eight quality control (QC) samples;

**Figure S3.** Comparison of the average number of IgG intact N-glycopeptides and N-glycans (A), and the positive rate of intact N-glycopeptides from IgG1 (B), IgG2 (C), IgG3 (D) and IgG4 (E) between HC, MN, DKD and IgAN group (“\*” means  $P < 0.05$ , “\*\*” means  $P < 0.005$ );

**Figure S4.** Comparison of the relative abundance of IgG subclasses between HC, MN, DKD and IgAN group;

(XLSX) **Table S1.** Relative abundance of IgG subclasses and the number of unique intact N-glycopeptides and N-glycans of quality control samples;

(XLSX) **Table S2.** Clinical de-mographics of HC, MN, DKD and IgAN groups;

(XLSX) **Table S3.** Positive rate of identified IgG intact N-glycopeptides from HC, MN, DKD and IgAN groups;

(XLSX) **Table S4.** Differentially expressed intact N-glycopeptides of human plasma IgGs from HC, MN, DKD and IgAN groups.

**Figure S1.** The relative abundance of IgG subclasses (A) and the number of unique intact N-glycopeptides and N-glycans (B) of quality control (QC) samples

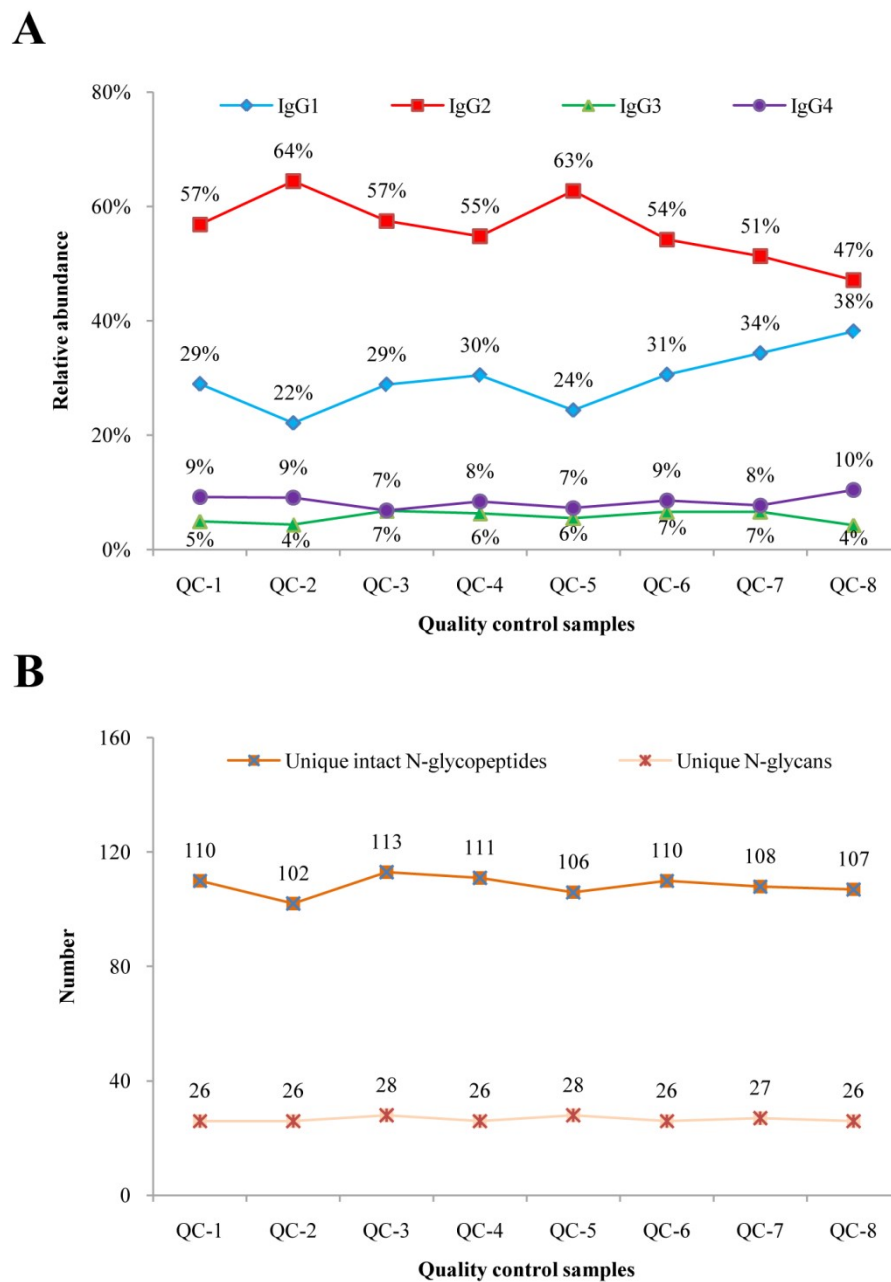

**Figure S2.** Correlation analysis of eight quality control (QC) samples

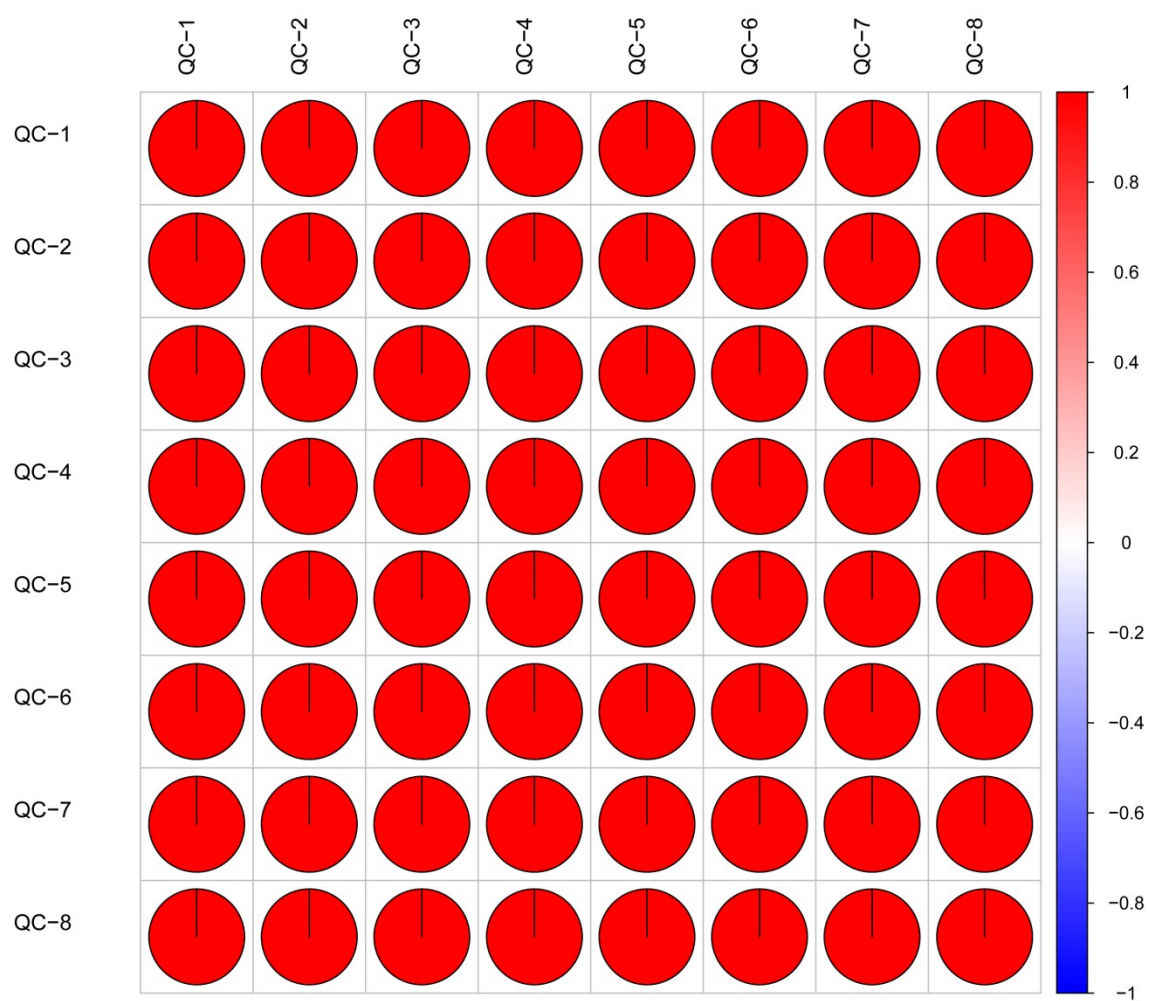

**Figure S3.** Comparison of the average number of IgG intact N-glycopeptides and N-glycans (A), and the positive rate of intact N-glycopeptides from IgG1 (B), IgG2 (C), IgG3 (D) and IgG4 (E) between HC, MN, DKD and IgAN group (\* means  $P<0.05$ , \*\* means  $P<0.005$ ).

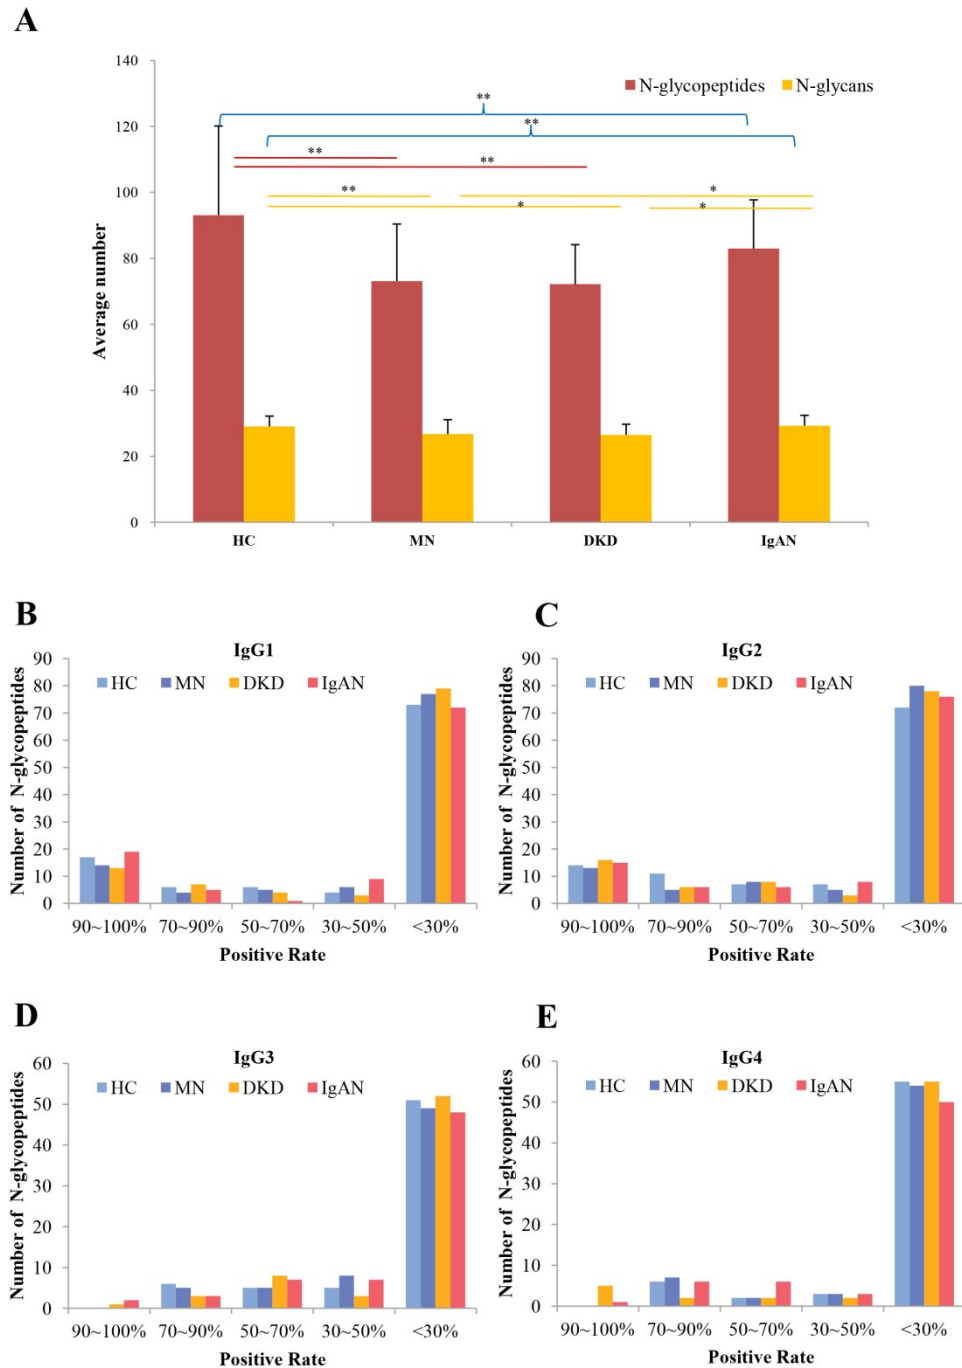

**Figure S4.** Comparison of the relative abundance of IgG subclasses between HC, MN, DKD and IgAN group.

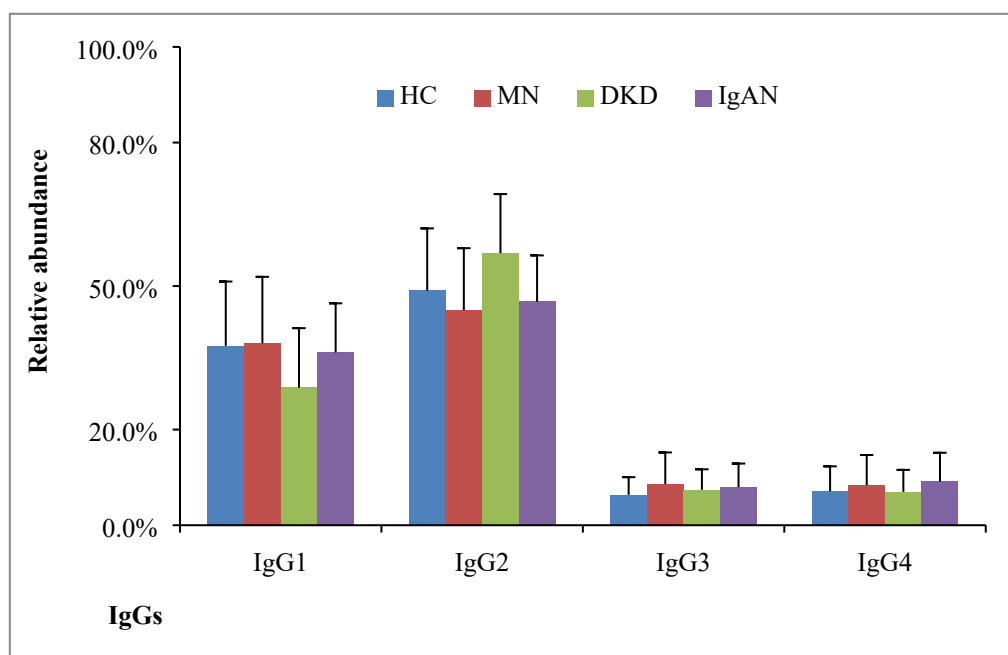

Supplement: d1an01657a1.pdf [file d1an01657a1.pdf]
